# Supplementary material
Source: PubMed Central journal article supplement (PMC9613611)
Supplement: NIHMS1832640-supplement-permission_Figure_1.pdf [file NIHMS1832640-supplement-permission_Figure_1.pdf]

[Cereb Circ Cogn Behav](#). Author manuscript; available in PMC 2021 Nov 5.

*Published in final edited form as:*

Cereb Circ Cogn Behav. 2021; 2: 100011.

Published online 2021 Apr 2. doi: [10.1016/j.cccb.2021.100011](https://doi.org/10.1016/j.cccb.2021.100011)

PMCID: PMC8570532

NIHMSID: NIHMS1724989

PMID: [34746872](https://pubmed.ncbi.nlm.nih.gov/34746872/)

## A double-dichotomy clustering of dual pathology dementia patients

[Arvind Caprihan](#),<sup>a,\*</sup> [Rajikha Raja](#),<sup>a,d</sup> [Laura J. Hillmer](#),<sup>b</sup> [Erik Barry Erhardt](#),<sup>c</sup> [Jill Prestopnik](#),<sup>b</sup> [Jeffrey Thompson](#),<sup>b</sup> [John C Adair](#),<sup>b</sup> [Janice E. Knoefel](#),<sup>b</sup> and [Gary A. Rosenberg](#)<sup>b</sup>

[Author information](#) [Copyright and License information](#) [Disclaimer](#)

[Copyright notice](#)

This is an open access article under the CC BY-NC-ND license (<http://creativecommons.org/licenses/by-nc-nd/4.0/>)
