# Supplementary material
Source: PubMed Central journal article supplement (PMC9613611)
Supplement: NIHMS1832640-supplement-permission_Figure_2B.pdf [file NIHMS1832640-supplement-permission_Figure_2B.pdf]

- [Home](#)
- Help

[FAQ Useful Link](#)

- [Email Support](#)
- Gary Rosenberg

Account #: 3000161289

[Account Info](#)  
[Sign Out](#)

White Matter Damage Is Associated With Matrix Metalloproteinases in Vascular Dementia

**Author:**

Gary A. Rosenberg, Niky Sullivan, Margaret M. Esiri

**Publication:**

Stroke

**Publisher:**

Wolters Kluwer Health, Inc.

**Date:**

May 1, 2001

Copyright © 2001, Wolters Kluwer Health

Order Completed

Thank you for your order.

This Agreement between Gary Rosenberg ("You") and Wolters Kluwer Health, Inc. ("Wolters Kluwer Health, Inc.") consists of your license details and the terms and conditions provided by Wolters Kluwer Health, Inc. and Copyright Clearance Center.

Your confirmation email will contain your order number for future reference.

License Number

5347740390393

[Printable Details](#)

License date

Jul 14, 2022

Licensed Content

Licensed Content Publisher

Wolters Kluwer Health, Inc.

Licensed Content Publication

Stroke

Licensed Content Title

White Matter Damage Is Associated With Matrix Metalloproteinases in Vascular Dementia

Licensed Content Author

Gary A. Rosenberg, Niky Sullivan, Margaret M. Esiri

Licensed Content Date

May 1, 2001

Licensed Content Volume

32

Licensed Content Issue

5

Order Details

Type of Use

Book/Textbook

Requestor type

University/College

Sponsorship

No Sponsorship

Format

Print and electronic

Portion

Figures/tables/illustrations

Number of figures/tables/illustrations

1

Author of this Wolters Kluwer article

Yes

Will you be translating?

No

Intend to modify/change the content

No

Publishing Open Access

No

About Your Work

Title of new book

Neuroinflammation in Vascular Dementia

Lead author

Gary Rosenberg

Publisher

Elsevier

Expected publication date

Dec 2022

Expected number of pages

250

Additional Data

Portions

Figure 2B

Requestor Location

Requestor Location

Gary Rosenberg  
HSC Neurology MSC10 5620  
1 University of New Mexico

ALBUQUERQUE, NM 87131  
United States  
Attn: Gary Rosenberg

Tax Details

Publisher Tax ID

13-2932696

Price

Total

0.00 USD

Total:

0.00 USD

[CLOSE WINDOW](#)

[ORDER MORE](#)

- © 2022 Copyright - All Rights Reserved
- [Copyright Clearance Center, Inc.](#)
- [Privacy statement](#)
- [Data Security and Privacy](#)
- [For California Residents](#)
- [Terms and Conditions](#)

Comments? We would like to hear from you. E-mail us at [customercare@copyright.com](mailto:customercare@copyright.com)
